# Supplementary material for: Maintenance-energy requirements and robustness of Saccharomyces cerevisiae at aerobic near-zero specific growth rates
Source: Springer Nature journal article supplement (doi:10.1186/s12934-016-0501-z), 2016-06-17

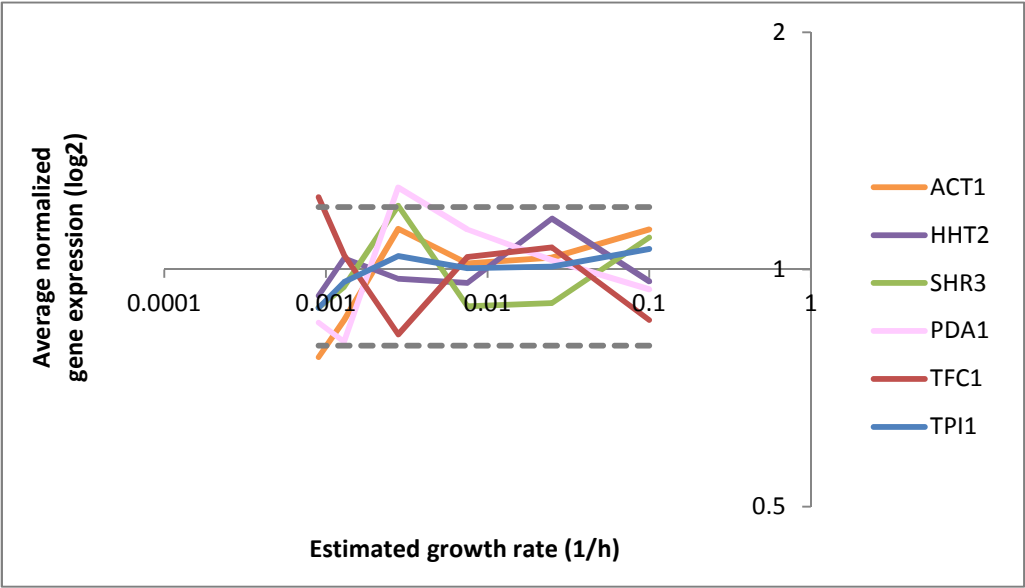

Supplement: MOESM13 [file 12934_2016_501_MOESM13_ESM.pdf]
